# Supplementary material for: Exploring the Link between Chronic Kidney Disease and Parkinson’s Disease: Insights from a Longitudinal Study Using a National Health Screening Cohort
Source: MDPI journal article supplement (doi:10.3390/nu15143205), 2023-07-19
Supplement: s1 [file s1]

**Table S1.** P-value of zph-test between chronic kidney disease and Parkinson’s disease.

| Characteristics     | P-value |
|---------------------|---------|
| Parkinson’s disease | 0.3973  |

**Table S2.** Fine and Gray regression analysis in Parkinson’s disease between chronic kidney disease and control groups.

|                    | Subdistribution Hazard ratios (95% confidence interval) |         |                          |         |
|--------------------|---------------------------------------------------------|---------|--------------------------|---------|
|                    | Crude                                                   | P-value | Overlap weighted model † | P-value |
| Total participants |                                                         |         |                          |         |
| CKD                | 1.03 (0.89–1.18)                                        | 0.726   | 0.92 (0.75–1.13)         | 0.428   |
| Control            | 1                                                       |         | 1                        |         |

† Adjusted for age, sex, income, region of residence, obesity, smoking, alcohol consumption, systolic blood pressure, diastolic blood pressure, fasting blood glucose, total cholesterol, and Charlson Comorbidity Index scores
